# Supplementary material for: Paramutation at the maize pl1 locus is associated with RdDM activity at distal tandem repeats
Source: PLOS journal article supplement (doi:10.1371/journal.pgen.1011296), 2024-05-30
Supplement: S1 (10.1371/journal.pgen.1011296.s001) [file journal.pgen.1011296.s001.pdf]

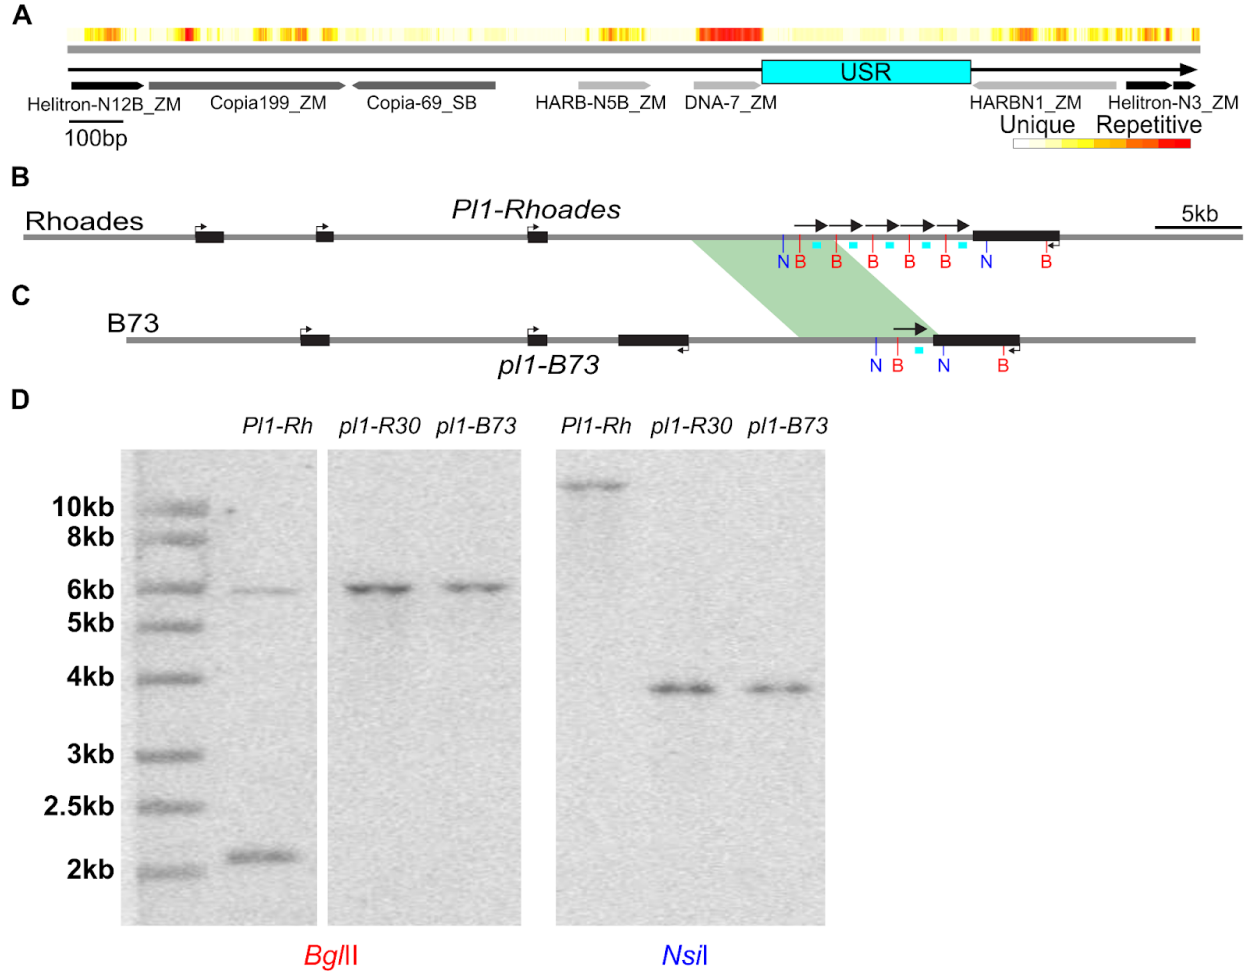

S1 Fig. Structures of *pl1* haplotypes

**(A)** Structure of a single copy of the *PI1-Rhoades* penta-repeat. Cyan box: unique subregion (USR) used as a hybridization probe. Arrows represent DNA transposons (light gray), *Helitrons* (black), and LTR retrotransposons (dark gray). *Bgl*II (B) and *Nsi*I (N) restriction sites producing hybridizing fragments in the *PI1-Rhoades* **(B)** and *pl1-B73* haplotypes **(C)** are shown. Black boxes represent gene models, large arrows represent the penta-repeat sequences, cyan boxes represent the USR, and green shading represents the region of recombination for *pl1-R30*. **(D)** Southern blot of *PI1-Rhoades* (*PI1-Rh*), *pl1-B73*, and *pl1-R30* genomic DNA digested with *Bgl*II and *Nsi*I and probed with a radiolabeled USR fragment.
