# Supplementary material for: Paramutation at the maize pl1 locus is associated with RdDM activity at distal tandem repeats
Source: PLOS journal article supplement (doi:10.1371/journal.pgen.1011296), 2024-05-30
Supplement: S2 (10.1371/journal.pgen.1011296.s002) [file journal.pgen.1011296.s002.pdf]

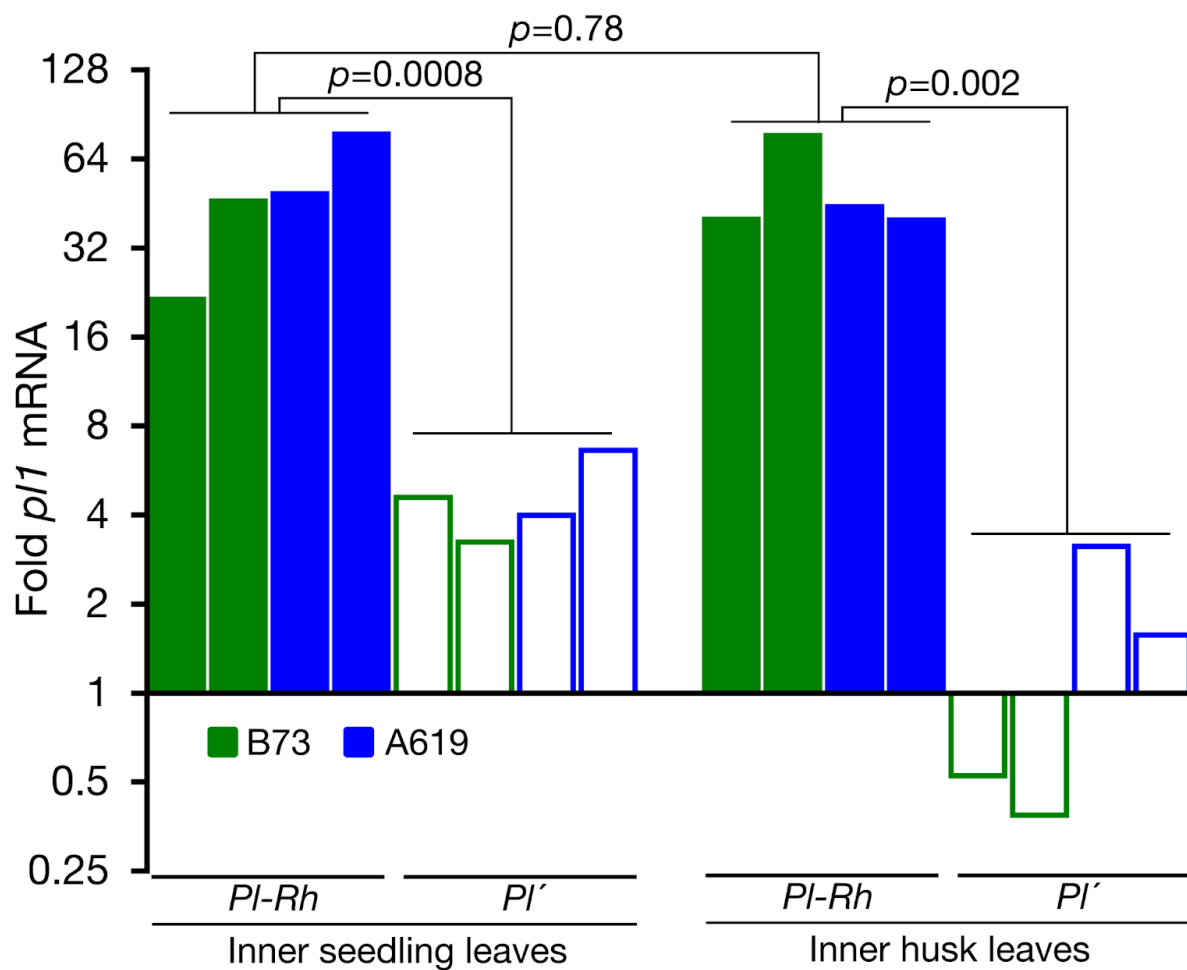

S2 Fig. *PI1-Rhoades* mRNA expression profiles

Mean fold *p/1* mRNA ( $2^{-\Delta\Delta C_t}$ ) in *PI-Rh* and *PI'* inner seedling and husk leaves relative to inner husk leaves from *PI'* individuals measured by qRT-PCR normalized to *actin1* levels in biological duplicate plants from A619 and B73 lines.
